# Supplementary material for: Hepcidin as a Diagnostic Biomarker in Anaemic Lung Cancer Patients
Source: MDPI journal article supplement (doi:10.3390/cancers15010224), 2022-12-30
Supplement: s1 [file s1]

# Supplementary Materials

## Hepcidin as a Diagnostic Biomarker in Anaemic Lung Cancer Patients

Katarzyna Wadowska <sup>1,\*</sup>, Piotr Błasiak <sup>2,3</sup>, Adam Rzechonek <sup>2,3</sup>, Iwona Bil-Lula <sup>1</sup> and Mariola Śliwińska-Mossoń <sup>1</sup>

<sup>1</sup> Department of Medical Laboratory Diagnostics, Division of Clinical Chemistry and Laboratory Haematology, Faculty of Pharmacy, Wrocław Medical University, Borowska 211A, 50-556 Wrocław, Poland

<sup>2</sup> Department and Clinic of Thoracic Surgery, Faculty of Medicine, Wrocław Medical University, Grabiszyńska 105, 53-439 Wrocław, Poland

<sup>3</sup> Lower Silesian Centre of Oncology, Pulmonology and Haematology, Lower Silesian Thoracic Surgery Centre, Grabiszyńska 105, 53-439 Wrocław, Poland

\* Correspondence: katarzyna.wadowska@student.umw.edu.pl; Tel.: +48-71-784-0626

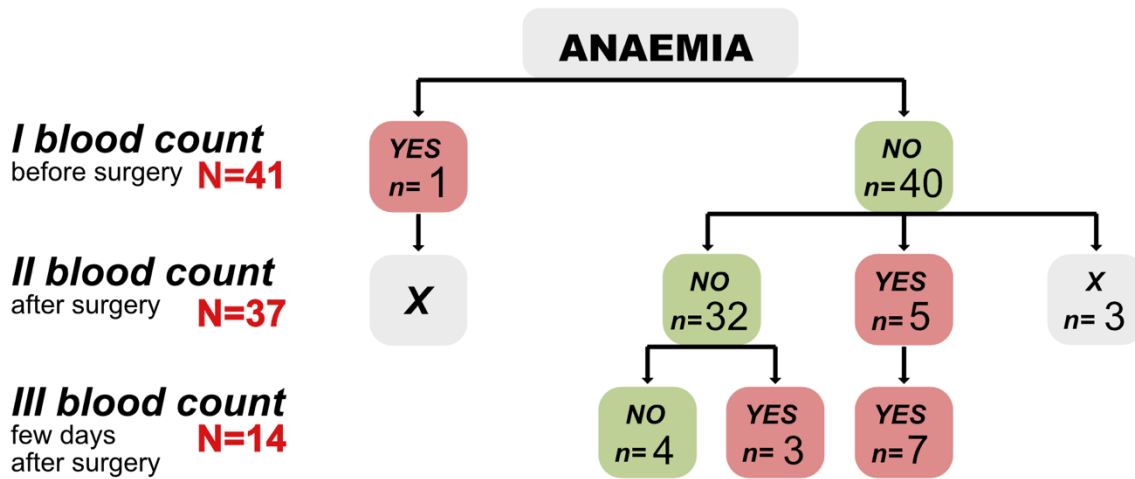

Figure S1. The prevalence of anaemia in women with operable lung cancer before and after surgery.

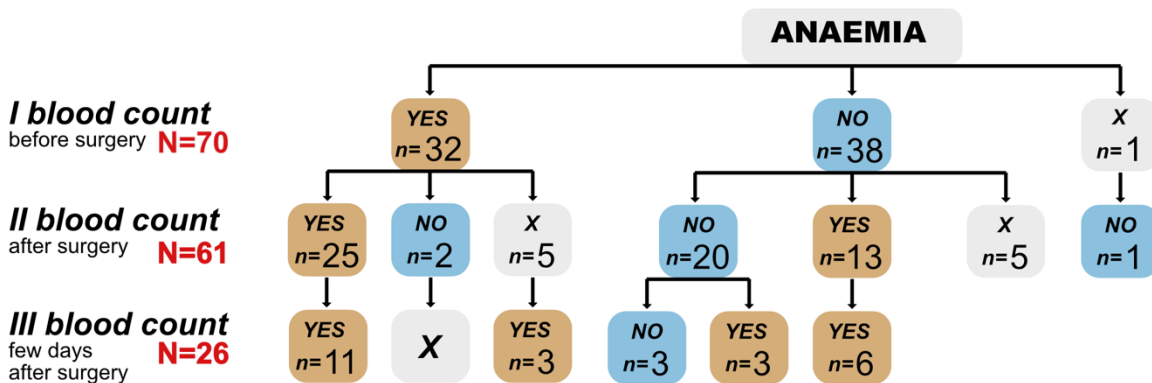

Figure S2. The prevalence of anaemia in men with operable lung cancer before and after surgery.

**Table S1.** Complete blood count parameters determined during hospitalization of women and men with operable lung cancer (dynamics of changes).

|                                 | Before surgery      | After surgery (on the day of surgery) | 3-4 days after surgery | Laboratory's reference values |
|---------------------------------|---------------------|---------------------------------------|------------------------|-------------------------------|
| <b>Women</b>                    | N=41                | N=37                                  | N=14                   |                               |
| Hb [g/dL] ± SEM                 | 13.15 ± 0.20        | 12.44 ± 0.23                          | <b>10.13 ± 0.46</b>    | 11.2 – 15.7                   |
| Ht [%] ± SEM                    | 39.39 ± 0.51        | 37.16 ± 0.64                          | <b>30.71 ± 1.32</b>    | 34 – 45                       |
| RBC [10 <sup>6</sup> /μL] ± SEM | 4.37 ± 0.06         | 4.13 ± 0.08                           | <b>3.42 ± 0.14</b>     | 3.93 – 5.22                   |
| MCV [fL] ± SEM                  | 90.44 ± 0.80        | 90.16 ± 0.88                          | 90.21 ± 1.33           | 79 – 95                       |
| MCH [pg] ± SEM                  | 30.15 ± 0.31        | 30.19 ± 0.35                          | 29.64 ± 0.46           | 26 – 32                       |
| MCHC [g/dL] ± SEM               | 33.33 ± 0.15        | 33.44 ± 0.17                          | 32.77 ± 0.22           | 32.2 – 35.5                   |
| RDW-SD [fL] ± SEM               | 44.93 ± 0.66        | 44.31 ± 0.69                          | 43.46 ± 0.93           | 36.4 – 46.3                   |
| RDW-CV [%] ± SEM                | 13.96 ± 0.20        | 13.79 ± 0.21                          | 14.10 ± 0.27           | 11.7 – 14.4                   |
| <b>Men</b>                      | N=71                | N=60                                  | N=26                   |                               |
| Hb [g/dL] ± SEM                 | <b>13.39 ± 0.18</b> | <b>12.71 ± 0.22</b>                   | <b>10.99 ± 0.35</b>    | 13.7 – 17.5                   |
| Ht [%] ± SEM                    | <b>40.19 ± 0.47</b> | <b>38.15 ± 0.59</b>                   | <b>33.46 ± 0.99</b>    | 40 – 51                       |
| RBC [10 <sup>6</sup> /μL] ± SEM | <b>4.44 ± 0.06</b>  | <b>4.20 ± 0.08</b>                    | <b>3.69 ± 0.12</b>     | 4.63 – 6.08                   |
| MCV [fL] ± SEM                  | 90.90 ± 0.79        | 91.52 ± 0.82                          | 91.04 ± 0.87           | 79 – 92                       |
| MCH [pg] ± SEM                  | 30.33 ± 0.32        | 30.51 ± 0.32                          | 29.85 ± 0.35           | 26 – 32                       |
| MCHC [g/dL] ± SEM               | 33.28 ± 0.15        | 33.28 ± 0.15                          | 32.75 ± 0.20           | 32.3 – 36.5                   |
| RDW-SD [fL] ± SEM               | <b>46.32 ± 0.52</b> | <b>46.16 ± 0.59</b>                   | <b>46.08 ± 0.89</b>    | 35.1 – 43.9                   |
| RDW-CV [%] ± SEM                | 14.33 ± 0.16        | 14.18 ± 0.18                          | 14.31 ± 0.24           | 11.6 – 14.4                   |

Hb – haemoglobin; Ht – haematocrit; RBC – red blood count; MCV – mean corpuscular volume; MCH – mean corpuscular haemoglobin; MCHC – mean corpuscular haemoglobin concentration; RDW-SD – red cell distribution width-standard deviation; RDW-CV – red cell distribution width-coefficient of variation; SEM – standard error of the mean; bold black text indicates mean values above laboratory's references, whereas bold blue text indicates mean values below laboratory's references

**Table S2.** Hepcidin, IL-6, TNF-α, CRP, and SAA<sub>1</sub> concentrations in non-anaemia and anaemia women who had one complete blood count examination (upon hospital admission).

| Parameter                | Anaemia upon admission to the hospital |               |
|--------------------------|----------------------------------------|---------------|
|                          | No-anaemia (N=3)                       | Anaemia (N=1) |
| Hepcidin [ng/mL]         |                                        |               |
| Mean ± SEM               | 80.02 ± 34.16                          | 194.56        |
| Median                   | 109.16                                 |               |
| Min – Max                | 11.94 – 118.97                         |               |
| IL-6 [pg/mL]             |                                        |               |
| Mean ± SEM               | 8.74 ± 1.56                            | 126.81        |
| Median                   | 7.26                                   |               |
| Min – Max                | 7.11 – 11.86                           |               |
| TNF-α [pg/mL]            |                                        |               |
| Mean ± SEM               | 2.09 ± 0.73                            | 302.38        |
| Median                   | 1.38                                   |               |
| Min – Max                | 1.35 – 3.55                            |               |
| CRP [mg/L]               |                                        |               |
| Mean ± SEM               | 9.57 ± 6.77                            | 2.78          |
| Median                   | 5.28                                   |               |
| Min – Max                | 0.60 – 22.84                           |               |
| SAA <sub>1</sub> [μg/mL] |                                        |               |
| Mean ± SEM               | 131.07 ± 71.62                         | 81.11         |
| Median                   | 131.07                                 |               |
| Min – Max                | 59.45 – 202.68                         |               |

IL-6 – interleukin 6; TNF- $\alpha$  - tumour necrosis factor  $\alpha$ ; CRP – C-reactive protein; SAA<sub>1</sub> – serum amyloid A<sub>1</sub>; SEM – standard error of the mean

**Table S3.** Hepcidin, IL-6, TNF- $\alpha$ , CRP, and SAA<sub>1</sub> concentrations in non-anaemia women and women with post-operative anaemia who had two complete blood counts.

| Parameter                      | Post-operative anaemia in the day of surgery |                         |
|--------------------------------|----------------------------------------------|-------------------------|
|                                | No-anaemia (N=21)                            | Developed anaemia (N=2) |
| Hepcidin [ng/mL]               |                                              |                         |
| Mean $\pm$ SEM                 | 106.33 $\pm$ 15.30                           | 49.75 $\pm$ 16.41       |
| Median                         | 91.33                                        | 49.75                   |
| Min – Max                      | 15.20 – 239.36                               | 33.34 – 66.16           |
| IL-6 [pg/mL]                   |                                              |                         |
| Mean $\pm$ SEM                 | 26.42 $\pm$ 3.69                             | 31.54 $\pm$ 26.08       |
| Median                         | 24.39                                        | 31.54                   |
| Min – Max                      | 0.32 – 57.28                                 | 5.46 – 57.61            |
| TNF- $\alpha$ [pg/mL]          |                                              |                         |
| Mean $\pm$ SEM                 | 2.27 $\pm$ 0.24                              | 2.14 $\pm$ 0.43         |
| Median                         | 2.06                                         | 2.14                    |
| Min – Max                      | 1.21 – 5.54                                  | 1.71 – 2.56             |
| CRP [mg/L]                     |                                              |                         |
| Mean $\pm$ SEM                 | 8.04 $\pm$ 4.12                              | 10.92 $\pm$ 10.32       |
| Median                         | 2.13                                         | 10.92                   |
| Min – Max                      | 0.25 – 84.72                                 | 0.60 – 21.23            |
| SAA <sub>1</sub> [ $\mu$ g/mL] |                                              |                         |
| Mean $\pm$ SEM                 | 81.59 $\pm$ 23.51                            | 134.83 $\pm$ 3.53       |
| Median                         | 7.33                                         | 134.83                  |
| Min – Max                      | 0.21 – 330.01                                | 131.30 – 138.35         |

IL-6 – interleukin 6; TNF- $\alpha$  - tumour necrosis factor  $\alpha$ ; CRP – C-reactive protein; SAA<sub>1</sub> – serum amyloid A<sub>1</sub>; SEM – standard error of the mean

**Table S4.** Hepcidin, IL-6, and TNF- $\alpha$  concentrations in (a) males with anaemia since hospital admission without and with comorbidities, (b) males who developed anaemia during hospitalization without and with comorbidities, and (c) males with no anaemia during hospitalization without and with comorbidities

| (a) Males with anaemia since hospital admission              |                               |                               |
|--------------------------------------------------------------|-------------------------------|-------------------------------|
| Parameter                                                    | Without comorbidities         | With comorbidities            |
| Hepcidin [ng/mL]                                             |                               |                               |
| Mean $\pm$ SEM                                               | 156.77 $\pm$ 33.35            | 177.44 $\pm$ 34.21            |
| Median                                                       | 180.89                        | 144.02                        |
| Min – Max                                                    | 0.08 – 380.71                 | 1.58 – 525.15                 |
| IL-6 [pg/mL]                                                 |                               |                               |
| Mean $\pm$ SEM                                               | 21.92 $\pm$ 5.32 <sup>a</sup> | 46.33 $\pm$ 5.61 <sup>a</sup> |
| Median                                                       | 22.24                         | 45.87                         |
| Min – Max                                                    | 0.36 – 59.84                  | 3.97 – 112.70                 |
| TNF- $\alpha$ [pg/mL]                                        |                               |                               |
| Mean $\pm$ SEM                                               | 4.05 $\pm$ 1.69               | 2.68 $\pm$ 0.41               |
| Median                                                       | 2.38                          | 2.21                          |
| Min – Max                                                    | 0.67 – 20.57                  | 0.57 – 8.92                   |
| (b) Males who developed anaemia during their hospitalization |                               |                               |
| Parameter                                                    | Without comorbidities         | With comorbidities            |
| Hepcidin [ng/mL]                                             |                               |                               |
| Mean $\pm$ SEM                                               | 234.75 $\pm$ 82.20            | 161.41 $\pm$ 33.78            |
| Median                                                       | 259.62                        | 115.17                        |

|                  |                                                    |                    |
|------------------|----------------------------------------------------|--------------------|
| Min – Max        | 81.59 – 363.05                                     | 39.16 – 429.52     |
| IL-6 [pg/mL]     |                                                    |                    |
| Mean ± SEM       | 28.31 ± 5.78                                       | 46.81 ± 11.42      |
| Median           | 27.42                                              | 46.14              |
| Min – Max        | 18.77 – 38.74                                      | 0.21 – 113.83      |
| TNF-α [pg/mL]    |                                                    |                    |
| Mean ± SEM       | 2.43 ± 0.54                                        | 11.19 ± 8.40       |
| Median           | 2.43                                               | 1.92               |
| Min – Max        | 1.89 – 2.96                                        | 1.29 – 111.55      |
| (c)              | Males with no anaemia during their hospitalization |                    |
|                  | Without comorbidities                              | With comorbidities |
| Hepcidin [ng/mL] |                                                    |                    |
| Mean ± SEM       | 203.60 ± 22.96                                     | 141.55 ± 23.83     |
| Median           | 169.25                                             | 143.16             |
| Min – Max        | 128.42 – 353.74                                    | 31.44 – 247.96     |
| IL-6 [pg/mL]     |                                                    |                    |
| Mean ± SEM       | 32.50 ± 9.73                                       | 21.50 ± 3.78       |
| Median           | 21.60                                              | 26.13              |
| Min – Max        | 5.26 – 100.72                                      | 5.80 – 37.00       |
| TNF-α [pg/mL]    |                                                    |                    |
| Mean ± SEM       | 2.86 ± 0.59                                        | 4.42 ± 1.07        |
| Median           | 1.93                                               | 3.01               |
| Min – Max        | 1.30 – 7.61                                        | 1.46 – 10.95       |

IL-6 – interleukin 6; TNF-α - tumour necrosis factor α; SEM – standard error of the mean; Statistical significances, Student's t-test: <sup>a</sup>p=0.005271 in IL-6 concentrations between males with anaemia since hospital admission and without comorbidities, and males with anaemia since hospital admission and with comorbidities

**Table S5.** Hepcidin, IL-6, TNF-α, CRP, and SAA<sub>1</sub> concentrations in non-anaemia and anaemia men who had one complete blood count examination (upon hospital admission).

| Parameter                | Anaemia upon admission to the hospital |                 |
|--------------------------|----------------------------------------|-----------------|
|                          | No-anaemia (N=5)                       | Anaemia (N=2)   |
| Hepcidin [ng/mL]         |                                        |                 |
| Mean ± SEM               | 155.97 ± 49.01                         | 82.09 ± 3.84    |
| Median                   | 154.87                                 | 82.09           |
| Min – Max                | 31.44 – 295.55                         | 78.25 – 85.92   |
| IL-6 [pg/mL]             |                                        |                 |
| Mean ± SEM               | 12.91 ± 2.72                           | 15.59 ± 7.56    |
| Median                   | 10.60                                  | 15.59           |
| Min – Max                | 9.80 – 18.33                           | 8.03 – 23.15    |
| TNF-α [pg/mL]            |                                        |                 |
| Mean ± SEM               | 2.69 ± 0.41                            | 3.19 ± 1.25     |
| Median                   | 2.78                                   | 3.19            |
| Min – Max                | 1.71 – 4.01                            | 1.94 – 4.44     |
| CRP [mg/L]               |                                        |                 |
| Mean ± SEM               | 12.01 ± 8.70                           | 65.81 ± 15.60   |
| Median                   | 4.40                                   | 65.81           |
| Min – Max                | 0.60 – 46.46                           | 50.21 – 81.40   |
| SAA <sub>1</sub> [μg/mL] |                                        |                 |
| Mean ± SEM               | 61.54 ± 57.38                          | 150.90 ± 47.32  |
| Median                   | 5.19                                   | 150.90          |
| Min – Max                | 1.26 – 291.01                          | 103.58 – 198.21 |

IL-6 – interleukin 6; TNF- $\alpha$  - tumour necrosis factor  $\alpha$ ; CRP – C-reactive protein; SAA<sub>1</sub> – serum amyloid A<sub>1</sub>; SEM – standard error of the mean

**Table S6.** Descriptive statistics of complete blood count parameters from the first and second complete blood count examinations, as well as hepcidin, IL-6, TNF- $\alpha$ , CRP, and SAA<sub>1</sub> levels in men with and without anaemia and men with post-operative anaemia.

| Parameter                      | The prevalence of anaemia in the day of surgery (after surgery) |                     |                                 |                     |                                 |                     |
|--------------------------------|-----------------------------------------------------------------|---------------------|---------------------------------|---------------------|---------------------------------|---------------------|
|                                | No-anaemia (N=15)                                               |                     | Developed anaemia (N=7)         |                     | Anaemia (N=16)                  |                     |
|                                | 1 <sup>st</sup> CBC                                             | 2 <sup>nd</sup> CBC | 1 <sup>st</sup> CBC             | 2 <sup>nd</sup> CBC | 1 <sup>st</sup> CBC             | 2 <sup>nd</sup> CBC |
| NCI grading [n (%)]            |                                                                 |                     |                                 |                     |                                 |                     |
| Grade 0                        | 15 (100%)                                                       | 15 (100%)           | 7 (100%)                        | -                   | -                               | -                   |
| Grade 1                        | -                                                               | -                   | -                               | 7 (100%)            | 16 (100%)                       | 12 (75%)            |
| Grade 2                        | -                                                               | -                   | -                               | -                   | -                               | 4 (25%)             |
| Grade 3                        | -                                                               | -                   | -                               | -                   | -                               | -                   |
| Grade 4                        | -                                                               | -                   | -                               | -                   | -                               | -                   |
| Hb [g/dL]                      |                                                                 |                     |                                 |                     |                                 |                     |
| Mean $\pm$ SEM                 | 14.82 $\pm$ 0.18 <sup>a,b</sup>                                 | 14.30 $\pm$ 0.16    | 13.96 $\pm$ 0.15 <sup>a,c</sup> | 12.70 $\pm$ 0.24    | 11.83 $\pm$ 0.27 <sup>b,c</sup> | 11.28 $\pm$ 0.34    |
| Median                         | 14.80                                                           | 14.20               | 13.80                           | 12.80               | 11.80                           | 11.05               |
| Min – Max                      | 13.80 – 16.60                                                   | 13.50 – 15.40       | 13.50 – 14.60                   | 11.40 – 13.30       | 10.00 – 13.40                   | 9.40 – 13.80        |
| RBC [mln/ $\mu$ L]             |                                                                 |                     |                                 |                     |                                 |                     |
| Mean $\pm$ SEM                 | 4.75 $\pm$ 0.08                                                 | 4.58 $\pm$ 0.09     | 4.57 $\pm$ 0.10                 | 4.26 $\pm$ 0.15     | 3.99 $\pm$ 0.15                 | 3.78 $\pm$ 0.14     |
| Median                         | 4.79                                                            | 4.66                | 4.61                            | 4.27                | 4.06                            | 3.69                |
| Min – Max                      | 4.23 – 5.24                                                     | 4.00 – 5.17         | 4.25 – 4.91                     | 3.70 – 4.92         | 2.83 – 5.27                     | 2.94 – 4.63         |
| Hepcidin [ng/mL]               |                                                                 |                     |                                 |                     |                                 |                     |
| Mean $\pm$ SEM                 | 161.50 $\pm$ 12.41 <sup>d</sup>                                 |                     | 90.84 $\pm$ 21.93 <sup>d</sup>  |                     | 126.50 $\pm$ 33.29              |                     |
| Median                         | 165.90                                                          |                     | 81.59                           |                     | 140.67                          |                     |
| Min – Max                      | 85.39 – 243.65                                                  |                     | 39.16 – 205.37                  |                     | 0.08 – 344.26                   |                     |
| IL-6 [pg/mL]                   |                                                                 |                     |                                 |                     |                                 |                     |
| Mean $\pm$ SEM                 | 21.34 $\pm$ 3.69                                                |                     | 25.93 $\pm$ 9.93                |                     | 29.08 $\pm$ 5.52                |                     |
| Median                         | 24.86                                                           |                     | 18.77                           |                     | 34.37                           |                     |
| Min – Max                      | 5.26 – 46.68                                                    |                     | 10.56 – 64.75                   |                     | 2.63 – 58.34                    |                     |
| TNF- $\alpha$ [pg/mL]          |                                                                 |                     |                                 |                     |                                 |                     |
| Mean $\pm$ SEM                 | 4.12 $\pm$ 0.85                                                 |                     | 19.23 $\pm$ 15.45               |                     | 3.60 $\pm$ 1.31                 |                     |
| Median                         | 2.41                                                            |                     | 2.96                            |                     | 1.91                            |                     |
| Min – Max                      | 1.30 – 10.95                                                    |                     | 1.29 – 111.55                   |                     | 0.57 – 20.57                    |                     |
| CRP [mg/L]                     |                                                                 |                     |                                 |                     |                                 |                     |
| Mean $\pm$ SEM                 | 21.58 $\pm$ 8.52                                                |                     | 19.98 $\pm$ 12.53               |                     | 32.79 $\pm$ 12.25               |                     |
| Median                         | 1.22                                                            |                     | 7.87                            |                     | 12.35                           |                     |
| Min – Max                      | 0.22 – 106.44                                                   |                     | 1.08 – 93.34                    |                     | 0.60 – 153.93                   |                     |
| SAA <sub>1</sub> [ $\mu$ g/mL] |                                                                 |                     |                                 |                     |                                 |                     |
| Mean $\pm$ SEM                 | 101.86 $\pm$ 38.96                                              |                     | 105.15 $\pm$ 53.91              |                     | 119.10 $\pm$ 30.52              |                     |
| Median                         | 10.96                                                           |                     | 19.83                           |                     | 127.67                          |                     |
| Min – Max                      | 0.62 – 548.31                                                   |                     | 2.63 – 336.87                   |                     | 0.75 – 395.53                   |                     |

CBC – complete blood count; NCI – National Cancer Institute; Hb – haemoglobin; RBC – red blood count; IL-6 – interleukin 6; TNF- $\alpha$  - tumour necrosis factor  $\alpha$ ; CRP – C-reactive protein; SAA<sub>1</sub> – serum amyloid A<sub>1</sub>; SEM – standard error of the mean; Statistical significances, One-way ANOVA: <sup>a</sup>p=0.023919 in haemoglobin concentration upon hospital admission between men who did not have anaemia and men who developed anaemia post-operatively; <sup>b</sup>p=0.000123 in haemoglobin concentration upon hospital admission between men who did not have anaemia and men who had anaemia; <sup>c</sup>p=0.000123 in haemoglobin concentration upon hospital admission between men who developed anaemia post-operatively and men who had anaemia; <sup>d</sup>p=0.007905 in hepcidin concentration between men without anaemia and men that developed anaemia post-operatively
